# Supplementary material
Source: PubMed Central journal article supplement (PMC5483909)
Supplement: JCM.02556-16_zjm999095548s1.pdf [file JCM.02556-16_zjm999095548s1.pdf]

**Supplemental Table 1.** Individual demographics of adult CF patients at incident *Achromobacter* spp.

isolation

| Pt. | Age | Sex | Mutation      | **PS | Achromobacter Species | <sup>a</sup> Baseline FEV1 (L) (% predicted) | <sup>b</sup> Baseline FVC (L) (% predicted) | <sup>c</sup> TIS | <sup>d</sup> AZM | <sup>e</sup> BA | <sup>f</sup> ICS | PA | SA | Co-morbidities | BMI  | O <sub>2</sub> |
|-----|-----|-----|---------------|------|-----------------------|----------------------------------------------|---------------------------------------------|------------------|------------------|-----------------|------------------|----|----|----------------|------|----------------|
| 1   | 35  | M   | 3659delC      | I    | -                     | 1.13 (28)                                    | 3.1 (63)                                    | Y                | Y                | Y               | Y                | Y  | N  | L, O           | 19.6 | Y              |
| 2   | 26  | F   | F508/         | I    | -                     | 0.98 (35)                                    | 1.91 (57)                                   | N                | N                | Y               | N                | Y  | N  | N/A            | 18.3 | Y              |
| 3   | 27  | F   | N/A           | S    | <i>A. insuavis</i>    | 0.94 (32)                                    | 1.55 (47)                                   | N                | N                | Y               | N                | Y  | Y  | N/A            | 19.9 | N              |
| 4   | 34  | F   | F508/F508     | I    | -                     | 3.31 (114)                                   | 4.24 (122)                                  | N                | N                | N               | N                | Y  | Y  | DIOS           | 26.2 | N              |
| 5   | 21  | M   | F508/F508     | I    | -                     | 1.81 (40)                                    | 3.42 (65)                                   | N                | N                | Y               | N                | Y  | Y  | N/A            | 15.7 | Y              |
| 6*  | 16  | M   | F508/         | I    | <i>A. xylooxidans</i> | 3.11 (79)                                    | 4.06 (95)                                   | Y                | N                | Y               | Y                | Y  | Y  | L, S           | 18.1 | N              |
| 7   | 21  | F   | N/A           | I    | -                     | 1.35 (38)                                    | 2.41 (61)                                   | Y                | N                | Y               | N                | Y  | N  | S              | 15.8 | N              |
| 8   | 31  | F   | N/A           | I    | -                     | 1.00 (33)                                    | 1.85 (53)                                   | N                | N                | Y               | N                | Y  | Y  | O, CFRD        | 19.9 | N              |
| 9*  | 63  | F   | F508/R117 H   | S    | <i>A. xylooxidans</i> | 1.42 (53)                                    | 2.48 (72)                                   | N                | N                | Y               | Y                | Y  | Y  | S              | 27.8 | N              |
| 10  | 31  | F   | F508/         | S    | <i>A. xylooxidans</i> | 1.54 (52)                                    | 2.23 (63)                                   | N                | N                | Y               | N                | Y  | N  | S              | 19.6 | N              |
| 11  | 21  | F   | N/A           | I    |                       | 3.38 (102)                                   | 4.55 (118)                                  | N                | N                | Y               | Y                | Y  | Y  | DIOS, L, S     | 23.8 | N              |
| 12* | 20  | M   | F508/F508     | I    | <i>A. xylooxidans</i> | 1.67 (42)                                    | 3.2 (69)                                    | N                | N                | Y               | Y                | Y  | Y  | L              | 18.9 | N              |
| 13  | 18  | F   | N/A           | I    | <i>A. ruhlandii</i>   | 1.71 (51)                                    | 2.91 (83)                                   | N                | N                | Y               | N                | N  | Y  | L, O           | 18.4 | N              |
| 14  | 42  | M   | F508/F508     | I    | -                     | 2.81 (77)                                    | 4.49 (102)                                  | N                | Y                | Y               | N                | Y  | Y  | L, S, O        | 20.1 | N              |
| 15  | 29  | M   | N/A           | S    | -                     | 1.22 (33)                                    | 2.6 (56)                                    | N                | N                | Y               | N                | Y  | Y  | N/A            | 20.1 | N              |
| 16  | 24  | F   | F508/F508     | I    | <i>A. insuavis</i>    | 2.68 (98)                                    | 3.97(119)                                   | N                | N                | Y               | N                | Y  | Y  | DIOS, O        | 18.8 | N              |
| 17  | 30  | F   | N/A           | S    | -                     | 0.95 (33)                                    | 1.8 (54)                                    | N                | N                | Y               | N                | Y  | Y  | N/A            | 21.8 | N              |
| 18* | 28  | M   | N/A           | I    | <i>A. xylooxidans</i> | 1.11 (27)                                    | 2.56 (50)                                   | N                | N                | Y               | N                | Y  | Y  | N/A            | 19.9 | N              |
| 19  | 20  | M   | F508/F508     | I    | <i>A. xylooxidans</i> | 2.36 (62)                                    | 3.29 (74)                                   | N                | N                | Y               | N                | N  | Y  | N/A            | 14.9 | N              |
| 20  | 25  | M   | F508/F508     | I    | <i>A. insuavis</i>    | 3.73 (87)                                    | 4.96 (100)                                  | N                | N                | Y               | Y                | Y  | N  | CFRD           | 20.9 | N              |
| 21* | 15  | F   | F508/F508     | I    | <i>A. insuavis</i>    | 2.19 (65)                                    | 2.71 (77)                                   | N                | N                | Y               | N                | N  | Y  | N/A            | 18   | N              |
| 22  | 18  | M   | N/A           | I    | -                     | 3.83 (103)                                   | 5.21 (130)                                  | N                | N                | Y               | N                | Y  | Y  | L, S           | 22.8 | N              |
| 23* | 24  | M   | F508/         | I    | -                     | 0.78 (22)                                    | 1.65 (38)                                   | Y                | N                | Y               | N                | Y  | N  | N/A            | 18.3 | N              |
| 24* | 23  | F   | N/A           | I    | <i>A. xylooxidans</i> | 2.04 (60)                                    | 3.39 (87)                                   | N                | N                | Y               | N                | Y  | N  | N/A            | 22.4 | N              |
| 25* | 39  | F   | N/A           | I    | <i>A. insuavis</i>    | 2.26 (82)                                    | 2.64 (81)                                   | N                | Y                | Y               | Y                | N  | Y  | CFRD, S, O     | 20   | N              |
| 26* | 25  | M   | F508/         | I    | <i>A. spanius</i>     | 1.5 (37)                                     | 1.8 (38)                                    | N                | N                | Y               | N                | Y  | Y  | CFRD           | 14.9 | Y              |
| 27  | 20  | F   | F508/F508     | I    | -                     | 1.24 (41)                                    | 1.82 (54)                                   | N                | N                | Y               | N                | Y  | Y  | O              | 16.6 | N              |
| 28  | 29  | F   | F508/F508     | I    | -                     | 1.27 (43)                                    | 1.99 (58)                                   | N                | N                | Y               | N                | Y  | Y  | N/A            | 20.7 | N              |
| 29  | 22  | F   | N/A           | I    | <i>A. xylooxidans</i> | 2.75 (88)                                    | 3.66 (103)                                  | Y                | Y                | N               | N                | N  | Y  | CFRD, L        | 21.5 | N              |
| 30  | 22  | F   | N/A           | I    | -                     | 0.81 (27)                                    | 1.56 (44)                                   | Y                | N                | Y               | N                | Y  | Y  | N/A            | 17   | N              |
| 31  | 24  | F   | G542X/        | I    | -                     | 2.19 (67)                                    | 3.49 (89)                                   | Y                | N                | Y               | N                | Y  | N  | N/A            | 18.4 | N              |
| 32  | 37  | M   | F508/3659delC | I    | <i>A. xylooxidans</i> | 1.53 (40)                                    | 4.29 (94)                                   | N                | N                | Y               | N                | N  | N  | N/A            | 24.5 | N              |
| 33* | 19  | M   | N/A           | I    | -                     | 3.42 (83)                                    | 4.61 (96)                                   | N                | N                | Y               | Y                | Y  | Y  | S, O           | 23.8 | N              |
| 34  | 18  | M   | N/A           | I    | <i>A. dolens</i>      | 3.94 (103)                                   | 5.37 (130)                                  | N                | N                | Y               | N                | Y  | Y  | S, O           | 18.7 | N              |

\*Chronic *Achromobacter* infections

\*\*\*PS: Pancreas Status; I = pancreatic insufficient; S = pancreatic sufficient

<sup>a</sup>Baseline FEV1 forced expiratory volume in 1 second recorded 2 years prior to index *Achromobacter* isolate

<sup>b</sup>Baseline FVC forced volume capacity recorded 2 years prior to index *Achromobacter* isolate

<sup>c</sup>TIS: chronic inhaled tobramycin therapy at time of *Achromobacter* isolate

<sup>d</sup>AZM: chronic azithromycin therapy at time of *Achromobacter* isolate

<sup>e</sup>BA: beta-agonist at time of *Achromobacter* isolate

<sup>f</sup>ICS: inhaled corticosteroid at time of *Achromobacter* isolate

BMI: Baseline BMI

CF comorbidities: DIOS distal intestinal obstruction syndrome, O = osteoporosis/osteopenia, L= liver disease, S = sinus disease,

CFRD = CF related diabetes

O<sub>2</sub> = on oxygen therapy at time of *Achromobacter* isolate

**Supplemental Table 2.** Quantification of biofilm production by *Achromobacter* spp. isolates

|                                                                   | <b>Mean Biofilm</b> | <b>SD</b> | <b>SEM</b> | <b>P-Value</b> |
|-------------------------------------------------------------------|---------------------|-----------|------------|----------------|
| <b>All Isolates (Non-xylooxidans) (n=17)</b>                      | 0.187               | 0.204     | 0.050      | -              |
| <b>All Isolates (<i>Achromobacter xylooxidans</i>) (n=14)</b>     | 0.675               | 0.599     | 0.160      | 0.0001         |
| <b>Incident Isolates (Non-xylooxidans) (n=10)</b>                 | 0.202               | 0.247     | 0.078      | -              |
| <b>Incident Isolates (<i>Achromobacter xylooxidans</i>) (n=9)</b> | 0.620               | 0.405     | 0.135      | 0.007          |
| <b>Transient Isolates (n=20)</b>                                  | 0.495               | 4.621     | 1.033      | -              |
| <b>Persistent Isolates (n=10)</b>                                 | 2.729               | 2.487     | 0.750      | 0.89           |

SD: Standard Deviation

SEM: Standard Error of the Mean
